# Supplementary material for: A facile synthesis of Cu–Ni bimetallic nanoparticle supported organo functionalized graphene oxide as a catalyst for selective hydrogenation of p-nitrophenol and cinnamaldehyde
Source: Royal Society of Chemistry journal article supplement (doi:10.1039/c6ra26443c), 2017-01-01
Supplement: c6ra26443c1.pdf [file c6ra26443c1.pdf]

Supplementary figures

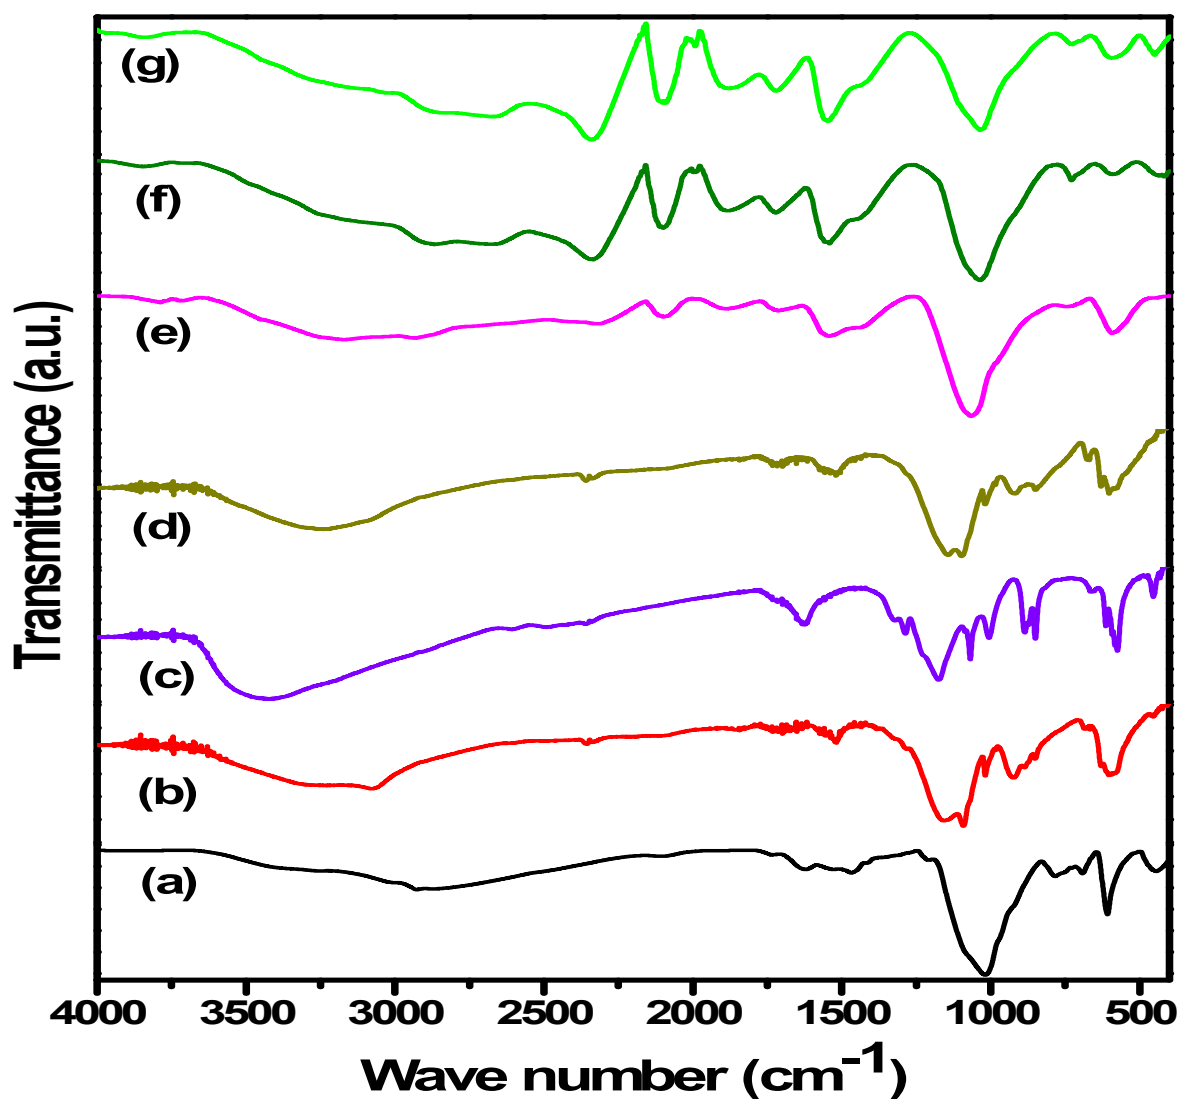

**Figure S1:** FTIR spectra (4000-400) of (a) AAPTMS@GO, (b) Ni-AAPTMS@GO, (c) Cu-AAPTMS@GO, (d) (1:1) Cu-Ni-AAPTMS@GO, (e) (1:1) Cu(0)-Ni(0)-AAPTMS@GO, (f) (1:2) Cu(0)-Ni(0)-AAPTMS@GO, and (g) (2:1) Cu(0)-Ni(0)-AAPTMS@GO.

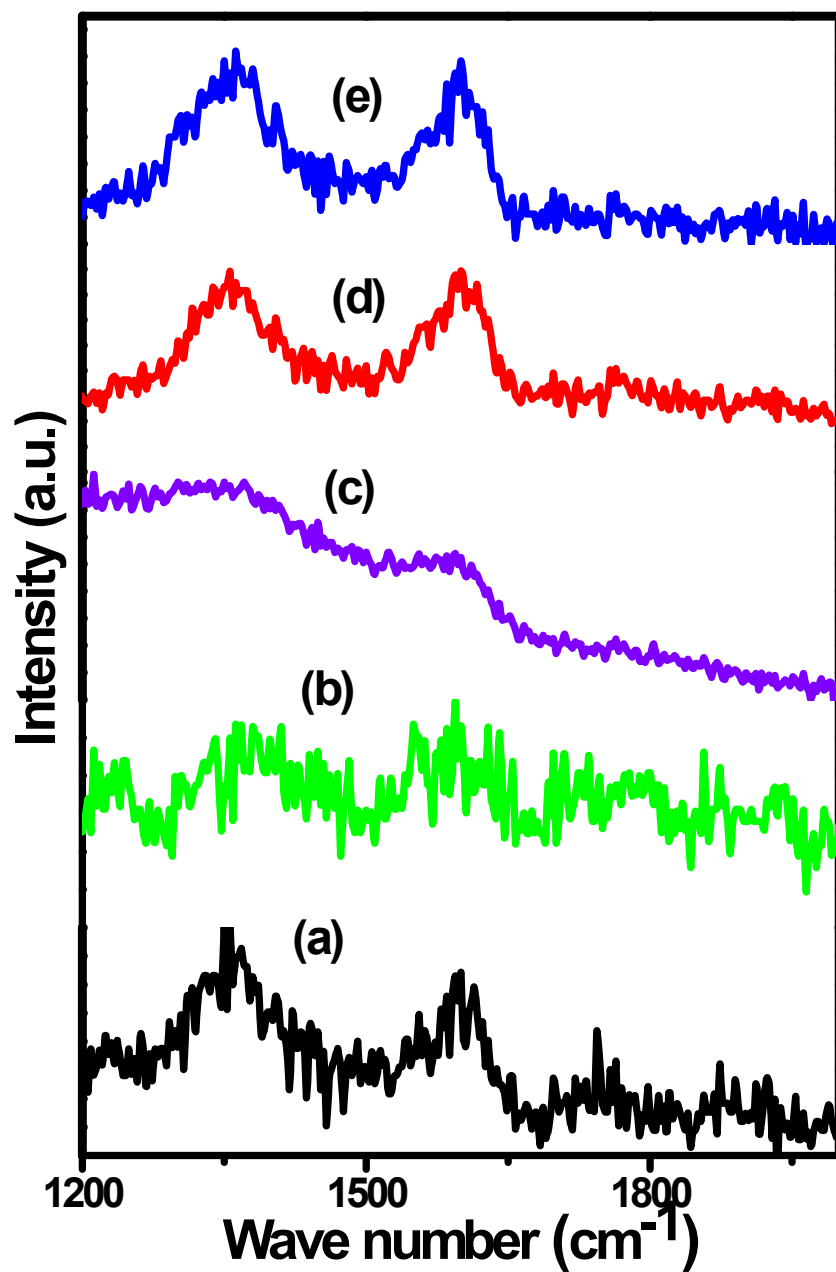

**Figure S2:** Raman spectra (1200-2000) of AAPTMS@GO (a), Cu-AAPTMS@GO (b), Ni-AAPTMS@GO (c), (1:1) Cu-Ni-AAPTMS@GO (d) and (1:1) Cu(0)-Ni(0)-AAPTMS@GO (e).

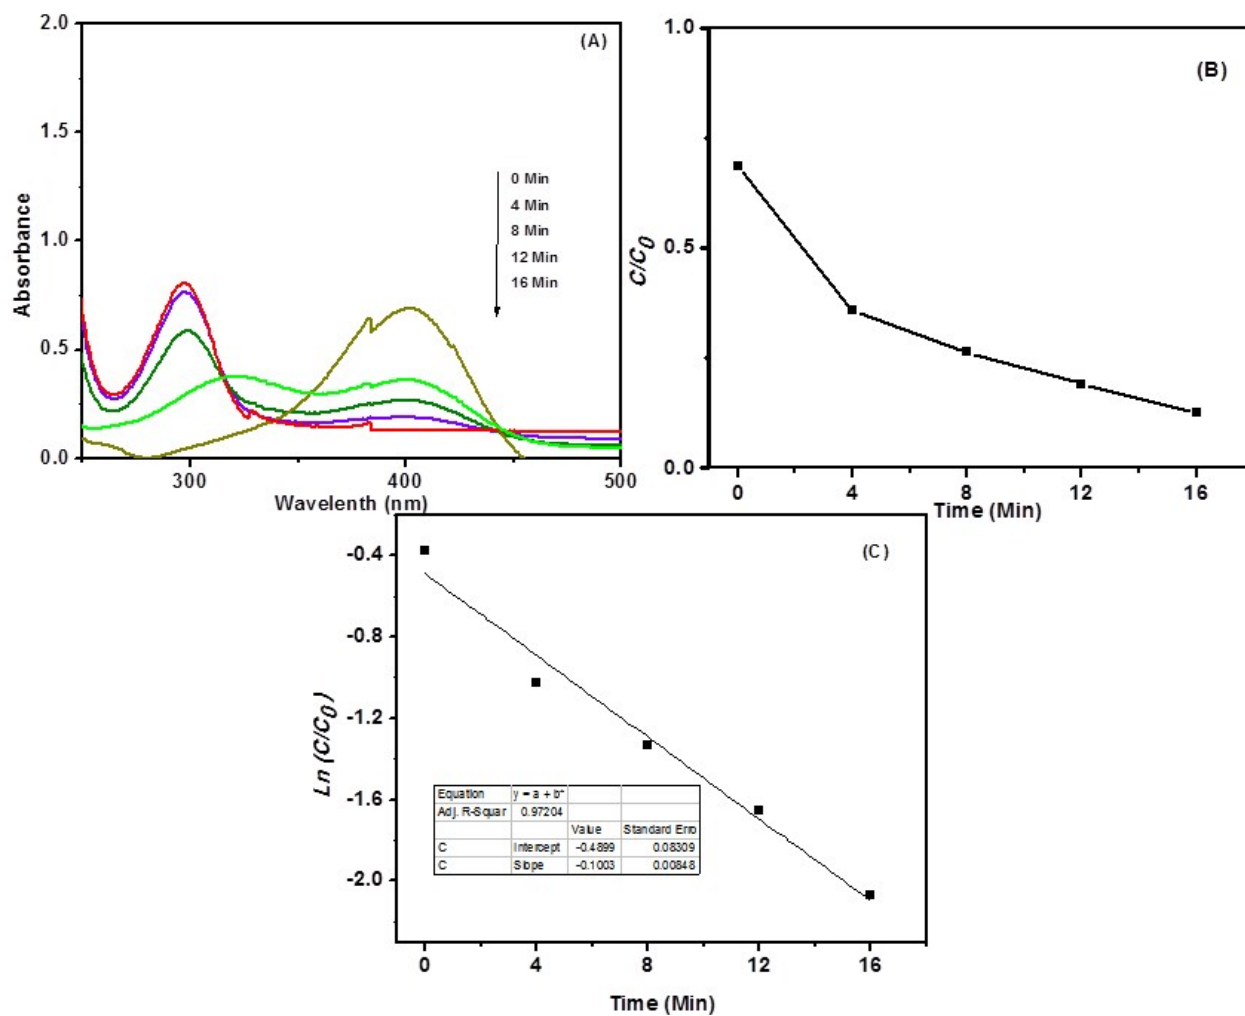

**Figure S3:** (A) UV-Vis absorption spectra during the catalytic reduction of p-nitrophenol over (1:1) Cu(0)-Ni(0)-AAPTMS@GO catalyst. (b) C/C0 and (c) ln(C/C0) versus reaction time for the reduction of p-nitro phenol over (1:1) Cu(0)-Ni(0)-AAPTMS@GO catalyst.

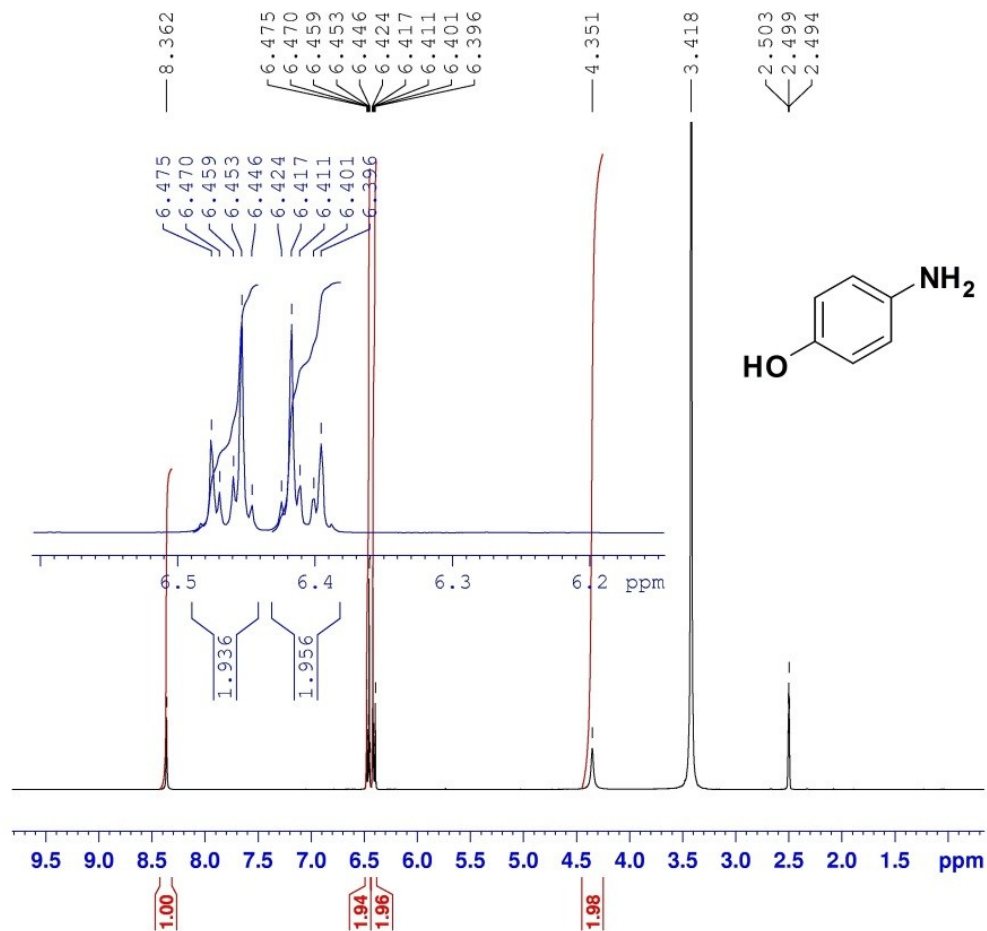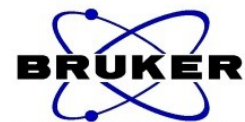

```

NAME      Feb08-2016-SBJ-Rana
EXPNO     20
PROCNO    1
Date_     20160209
Time      12.36
INSTRUM   spect
PROBHD    5 mm PABBO BB-
PULPROG   zg30
TD        32768
SOLVENT   DMSO
NS        16
DS        2
SWH       8223.685 Hz
FIDRES    0.250967 Hz
AQ        1.9923444 sec
RG        203
DW        60.800 usec
DE        6.50 usec
TE        298.3 K
D1        1.00000000 sec
TD0       1

```

```

===== CHANNEL f1 =====
NUC1      1H
P1        10.00 usec
PL1       -3.00 dB
PL1W      15.48668575 W
SFO1      400.2224715 MHz
SI        16384
SF        400.2200000 MHz
WDW       EM
SSB       0
LB        0.30 Hz
GB        0
PC        1.00

```

**Figure S4 (a):** <sup>1</sup>H NMR spectrum of final product (p-aminophenol).

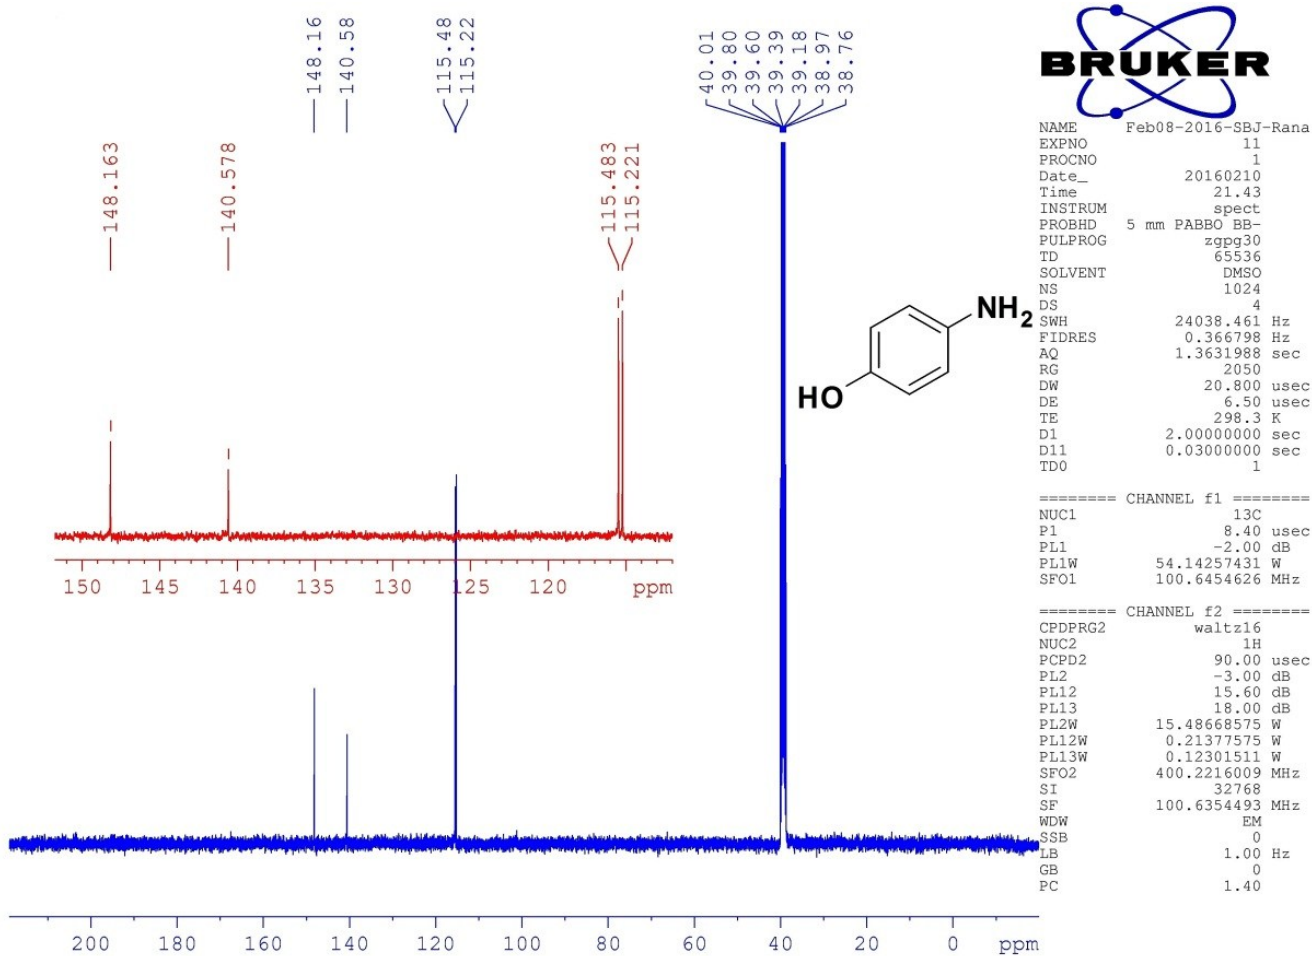

**Figure S4(b):** <sup>13</sup>C NMR spectrum of final product (p-aminophenol).

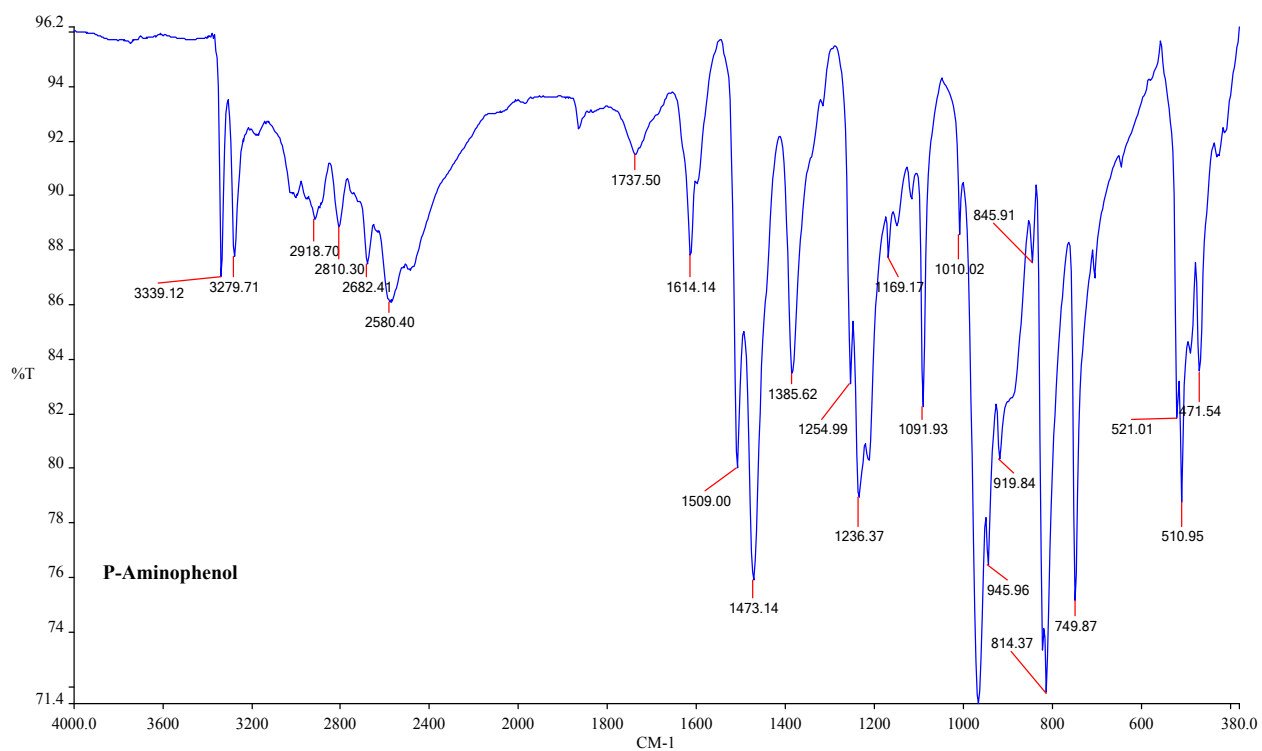

**Figure S4(c):** FTIR spectrum of final product (p-aminophenol).

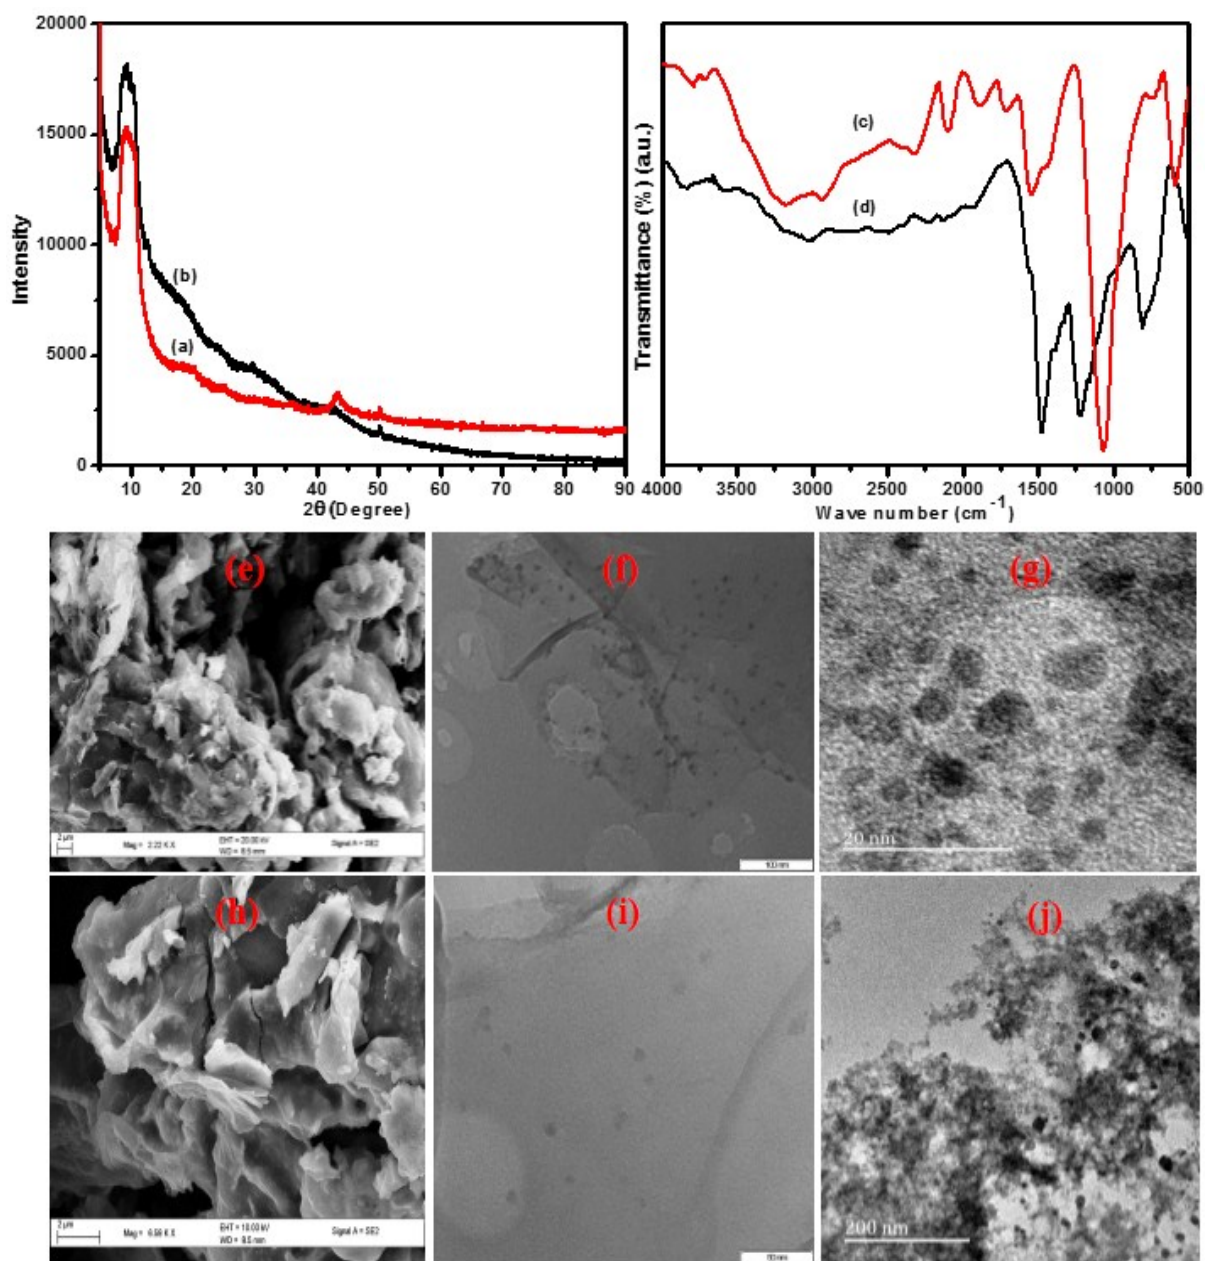

**Figure S5:** XRD of (a) 6<sup>th</sup> cycle (b) 7<sup>th</sup> cycle of reused catalyst and FTIR spectra of (c) 6<sup>th</sup> cycle (d) 7<sup>th</sup> cycle of reused catalyst, SEM image of (e) 6<sup>th</sup> cycle (scale bar = 2 μm) (h) 7<sup>th</sup> cycle (scale bar = 2 μm), TEM image of (f) 6<sup>th</sup> cycle (scale bar = 100 nm) (i) 7<sup>th</sup> cycle (scale bar = 50 nm), and HRTEM analysis of (g) 6<sup>th</sup> cycle (scale bar = 20 nm) (j) 7<sup>th</sup> cycle (scale bar = 200 nm) of reused (1:1) Cu(0)-Ni(0)-AAPtMS@GO catalyst.
